# Supplementary material
Source: Elsevier journal article supplement (https://www.sciencedirect.com/science/article/pii/S244438241730055X)
Supplement: mmc1 [file S244438241730055X:mmc1.docx]

**Annexo 1. Encuesta de satisfacción del Programa de detección precoz de cáncer de colon y recto de Barcelona (PDPCCR-Bcn).**

La encuesta se compone de 9 bloques, relativos a los diferentes aspectos y fases del Programa.

Para cada bloque se especifica el perfil o perfiles que lo contestan:

- Perfil A: No participantes en el Programa
- Perfil B: Participantes con resultado negativo de la prueba de sangre oculta en heces
- Perfil C: Participantes con resultado positivo de la prueba de sangre oculta en heces

BLOQUE 1: PRIMER CONTACTO CON EL PROGRAMA TODOS A, B, C

En primer lugar, hablemos del primer contacto que tuvo usted con el Programa de detección precoz de cáncer de colon y recto de Barcelona.

P1a. ¿Cuántas veces ha recibido información del Programa?

1

2

>2 → ¿alguna vez en otro programa?

SÍ 

NO 

P1b.- Antes de recibir la primera carta que se le envió desde el Programa, ¿consideraba que este cáncer era un problema de salud importante que le podía afectar?

1. Mucho

2. Bastante

3. Poco

4. Nada

9. No sabe/Nocontesta (Ns/Nc)

P2a.- Antes de recibir este año la carta que se le envió desde el Programa, ¿había oído hablar de este programa?

1. Sí, había oído hablar 🡺 P2b.- ¿Dónde? [Respuesta espontánea y múltiple]

1. Ya es la segunda vez que me invitan 2. En los medios de comunicación (TV, radio, prensa)

3. En la farmacia 4. En su médico de cabecera o especialista 5. Me habían hablado de ello familiares/amigos 6.Otros Especificar cuáles

9. Ns/Nc 2. No había oído hablar

9. No recueda/Ns/Nc

BLOQUE 2: MATERIAL INFORMATIVO Y PAPEL DEL MÉDICO DE CABECERA

TODOS A, B, C

P3a.- Hablemos de la carta de invitación que recibió del Programa. ¿La leyó?

1. Sí 🡺 P3b.- ¿Piensa que su contenido era fácil de entender: mucho, bastante, poco o nada?

1. Muy fácil de entender

2. Bastante fácil de entender

3. Poco fácil de entender

4. Nada fácil de entender

9. No lo recuerda/Ns/Nc

2. No 🡺 P3c.-¿Por qué?

1. No me interesaba

2. Falta de tiempo

3. Ya lo sabía

4. Otros: [Especificar]

9. No recuerda/Ns/Nc

P4a.- Junto a la carta también había un tríptico informativo. ¿Lo leyó?

1. Sí 🡺 P4b.-¿Piensa que su contenido era fácil de entender: mucho, bastante, poco o nada?

1. Muy fácil de entender

2. Bastante fácil de entender

3. Poco fácil de entender

4. Nada fácil de entender

9. No recuerda/Ns/Nc

2. No 🡺 P4c.- ¿Por qué?

1. No me interesaba

2. Falta de tiempo

3. Ya lo sabía

4. Otros: [Especificar]

9. No recuerda/Ns/Nc

P5a.- Como VALORA globalmente la claridad de la información recibida en papel en una escala de 0 a 10, siendo 0 muy deficiente y 10 excelente [preguntar SÓLO si ha contestado que Sí a la pregunta P3a y/o P4a]

P5b.- Comentario:

P6a.- Después de recibir esta carta ¿fue a pedir consejo a su médico de cabecera?

1. Sí 🡺 P6b.- ¿Su médico de cabecera tenía conocimientos del programa?

1. Sí

2. No

9. No recuerda/Ns/Nc

P6c.- Le aconsejaron que participara en el programa?

1. Sí

2. No

9. No recuerda/Ns/Nc

2. No

9. No recuerda/Ns/Nc

BLOQUE 3: ATENCIÓN TELEFÓNICA GENERAL TODOS A, B, C

P7a. ¿Contactó telefónicamente con el programa en algún momento?

1. Sí 🡺 P7b.- ¿Le fue sencillo contactar telefónicamente con el programa: mucho, bastante, poco o nada?

1. Mucho

2. Bastante

3. Poco

4. Nada

9. Ns/Nc

P7c.- ¿Le resolvieron el motivo por el cuál llamó: totalmente, bastante, poco o mucho?

1. Totalmente

2. Bastante

3. Poco

4. Nada

9. Ns/Nc

2. No 🡺 pasa al siguiente Bloque

9. No recuerda/Ns/Nc

P8.- ¿Cómo VALORA globalmente la atención recibida telefónicamente por parte del programa n una escala de 0 a 10, siendo 0 muy deficiente y 10 excelente [preguntar SÓLO si ha contestado que SÍ a la P7a]

BLOQUE 4: ATENCIÓN EN LA FARMACIA SÓLO PERFIL B + C

P9- Fue personalmente a la farmacia a recoger la prueba ¿es así?

1. Sí 🡺 P10

2. No 🡺 ¿Quién fue??

a. Pareja

b. Otro familiar

c. Otro

9. No recuerda/Ns/Nc 🡺 siguiente bloque

P10. ¿Cómo valora el papel de las farmacias dentro del Programa? Valore del 1 al 10

P10a – accesibilidad

P10b –confianza

P10c – utilidad de las explicaciones

P10d – Otros aspectos que valore: *[especificar]*

P11. ¿El farmacéutico influyó de alguna manera en su decisión de participar?

1. Mucho

2. Bastante

3. Poco

4. Nada

9. Ns/Nc

P12. ¿Qué farmacia escogió para ir a buscar la prueba?

1. La más cercana

2. La que voy habitualmente

3. Ningún criterio (“aleatorio”)

4. Otros motivos: [especificar]

9. Ns/Nc

P13. Cuando fue a la farmacia para recoger la prueba, ¿el rato que tuvo que esperar hasta que le atendieron fue mucho, bastante, poco o nada largo?

4. Mucho

3. Bastante

2. Poco

1. Nada

9. Ns/Nc

P14.- En cuanto al profesional/profesionales que le atendieron en la farmacia, ¿considera que la atención que le dieron fue correcta y respetuosa?

1. Muy correcta y respetuosa

2. Bastante correcta y respetuosa

3. Poco correcta y respetuosa

4. Nada correcta y respetuosa

9. Ns/Nc

P15.- ¿La información que le dieron en la farmacia acerca de lo que tenía que hacer fue suficiente: mucho, bastante, poco o nada?

1. Mucho

2. Bastante

3. Poco

4. Nada

8. No le dieron información 🡺 Pasar a P17

9. Ns/Nc

P16.- ¿Y esta información fue clara y entendedora: mucho, bastante, poco o nada?

1. Mucho

2. Bastante

3. Poco

4. Nada

9. Ns/Nc

P17.- En el caso de tuviera, le resolvieron las dudas que planteó acerca del Programa y la prueba?

1. Sí

2. No

8. No tuvo dudas

9. No recuerda/Ns/Nc

P18a.- ¿Echó de menos alguna información que le hubiera podido ayudar y no le dieron y/o no le quedara bastante clara?

1. Sí 🡺 P18b.- ¿Qué información? [respuesta espontánea y múltiple]

1. Toma de la muestra

4. Otros: [especificar]

2. Antecedentes familiares/personales

3. Pruebas hechas con anterioridad

9. No recuerda/Ns/Nc

2. No

9. No recuerda/Ns/Nc

P19.- ¿Cómo VALORA globalmente la atención recibida en la farmacia en una escala de 0 a 10, siendo 0 muy deficiente y 10 excelente (sólo se pregunta si ha contestado que Sí a la pregunta introductoria)

BLOQUE 5: PRUEBA DE SANGRE OCULTA EN HECES SÓLO PERFIL B + C

Ahora hablaremos acerca de la prueba que se llevó de la farmacia.

P20.- En la farmacia, junto con la prueba, le dieron una hoja de instrucciones con dibujos y explicaciones para la recogida de la muestra. ¿Tuvo dificultades en entender estas instrucciones: mucho, bastante, poco o nada?

4. Muchas dificultades

3. Bastantes dificultades

2. Pocas dificultades

1. Ninguna dificultad

8. No se lo dieron

9. Ns/Nc

P21.- ¿Tuvo alguna dificultad al recoger la muestra: muchas, bastantes, pocas o nada?

4. Muchas dificultades

3. Bastantes dificultades

2. Pocas dificultades

1. Ninguna dificultad

8. No se hizo la prueba

9. Ns/Nc

BLOQUE 6: RESULTADO DE LA PRUEBA NEGATIVO SÓLO PERFIL B

Hablemos ahora del resultado de la prueba que le enviaron por carta.

P22.- ¿Durante el tiempo que esperó recibir el resultado de la prueba, estuvo preocupado o nervioso: mucho, bastante, poco o nada?

4. Mucho

3. Bastante

2. Poco

1. Nada

9. Ns/Nc

P23.- ¿Cómo valora el tiempo que esperó desde que le hicieron la prueba hasta que le comunicaron el resultado: corto, normal o largo?

1. Corto

2. Normal/adecuado

3. Largo

9. Ns/Nc

P24a.- ¿Leyó la carta que le informaba del resultado?

1. Sí 🡺 P24b.- ¿Piensa que su contenido era fácil de entender: mucho, bastante, poco o nada?

1. Muy fácil de entender

2. Bastante fácil de entender

3. Poco fácil de entender

4. Nada fácil de entender

9. No recuerda/Ns/Nc

2. No

9. No recuerda/Ns/Nc

P25a.- ¿Consultó el contenido de la carta y/o el resultado de la prueba con alguna persona?

1. Sí 🡺 P25b.- ¿Con quién? [respuesta espontánea y múltiple]

1. Médico de cabecera

2. Farmacéutico

3. Familiar/amigo/conocido

4. Oficina del Programa

5. Otros: [especificar]

9. No recuerda/Ns/Nc

2. No

9. No recuerda/Ns/Nc

BLOQUE 7: ESPERA DEL RESULTADO DE LA PRUEBA POSITIVA SÓLO PERFIL C

Hablemos ahora del resultado que le comunicaron por teléfono.

P22.- ¿Durante el tiempo que esperó recibir el resultado de la prueba, estuvo preocupado o nervioso: mucho, bastante, poco o nada?

4. Mucho

3. Bastante

2. Poco

1. Nada

9. Ns/Nc

P23.- ¿Cómo valora el tiempo que esperó desde que le hicieron la prueba hasta que le comunicaron el resultado: corto, normal o largo?

1. Corto

2. Normal/adecuado

3. Largo

9. Ns/Nc

P24.- ¿Se preocupó, sintió miedo, cuando le dijeron que tenía que venir a la consulta del Programa al hospital?

4. Mucho

3. Bastante

2. Poco

1. Nada

9. Ns/Nc

P25.- ¿Cómo valora el tiempo que esperó desde que le comunicaron el resultado hasta que vino a la consulta del Programa al hospital: corto, normal o largo?

1. Corto

2. Normal/adecuado

3. Largo

9. Ns/Nc

P26.- Después de la llamada, fue a la consulta del Programa al hospital donde le explicaron el resultado de la prueba y le propusieron de hacer una colonoscopia. ¿La información que recibió fue clara y entendedora: mucho, bastante, poco o nada?

1. Mucho

2. Bastante

3. Poco

4. Nada

8. No fue a la consulta

9. Ns/Nc

P27a.- Posteriormente se realizó una colonoscopia en el hospital del Programa, ¿verdad? Respecto a la preparación que le dieron en la consulta [explicar, o mencionar el nombre comercial del preparado laxante] valore el grado de molestias que le supuso:

1. Mínimas molestias

2. Pocas molestias

3. Bastantes molestias

4. Muchas molestias

8. No se realizó ninguna colonoscopia en el hospital del Programa 🡺 Pasar a P28.

9. Ns/Nc

P27b.- ¿Y cómo valora el grado de molestias de la colonoscopia?

1. Mínimas molestias

2. Pocas molestias

3. Bastantes molestias

4. Muchas molestias

8. No se realizó ninguna colonoscopia en el hospital del Programa

9. Ns/Nc

BLOQUE 8: MOTIVOS DE NO PARTICIPACIÓ Y PROPUESTAS SÓLO PERFIL A

P9. Usted recibió la carta y no recogió la prueba en la farmacia. ¿Cuál fue el motivo? [respuesta espontánea, opción múltiple, se pueden marcar más de una]

1. Descuido, olvido, pérdida de la carta...

2. Colonoscopia reciente, control por otro médico

3. No entendió la carta

4. Aprensión por el resultado, miedo de la prueba

5. No quiso participar (no especifica motivo )

6. No le dio importancia, no lo considera relevante para la salud

7. Impedimento físico, laboral, personal, etc

8. Otros: [Especificar]

9. Ns/Nc

P10.- En este Programa intervienen las farmacias del barrio de forma activa, es dónde le dan la prueba y le explican cómo debe hacerse la prueba. ¿Lo sabía?

1. Sí

2. No

9. No recuerda/Ns/Nc

P11.- ¿Qué factores considera que podrían facilitar la participación? [Respuesta espontánea y múltiple]

1. Disponer de más información sobre el Programa y/o su funcionamiento

2. Disponer de más información sobre el cáncer de colon y recto

3. Informar más y/o por otros canales: [Especificar canales]

4. Que el médico de cabecera se lo recomendase

5. Otros: [Especificar]

9. Ns/Nc

P12.- ¿Quiere añadir algún comentario más acerca de lo que le he preguntado o sobre el Programa prevención del cáncer de colon en general? [Respuesta espontánea y múltiple]

1. __________________________________________________________________________________
2. __________________________________________________________________________________
3. __________________________________________________________________________________

9. Ns/Nc

BLOQUE 9: VALORACIÓN GLOBAL DEL PROGRAMA SÓLO PERFIL B + C

Ahora nos gustaría conocer su satisfacción global con el Programa.

P28.- ¿Cómo VALORA globalmente en una escala de 0 a 10, siendo 0 muy deficiente y 10 excelente, este Programa?

P28.- ¿Qué aspectos positivos destacaría del programa? [Respuesta espontánea y múltiple]

1. _______________________________________________________________________________
2. _______________________________________________________________________________
3. _______________________________________________________________________________

99. Ns/Nc

P29.- ¿Qué aspectos mejoraría? [Respuesta espontánea y múltiple]

1. ______________________________________________________________________________
2. ______________________________________________________________________________
3. ______________________________________________________________________________

99. Ns/Nc

P30.- ¿Quiere añadir algún comentario más acerca de lo que le he preguntado o sobre el Programa prevención del cáncer de colon en general? [Respuesta espontánea y múltiple]

1. ______________________________________________________________________________
2. ______________________________________________________________________________
3. ______________________________________________________________________________

99. Ns/Nc
